# Supplementary material for: Dehydration of xylose to furfural in a biphasic system: catalyst selection and kinetic modelling discrimination
Source: Royal Society of Chemistry journal article supplement (doi:10.1039/d4re00572d), 2025-01-01
Supplement: d4re00572d1.pdf [file d4re00572d1.pdf]

## Dehydration of Xylose to Furfural in a Biphasic System: Catalyst Selection and Kinetic Modelling Discrimination

Dominik Soukup-Carne <sup>a</sup>, Ben Hillman<sup>b</sup>, Christopher M. A. Parlett <sup>a,c,d,e</sup>, Xiaolei Fan <sup>a,f</sup>, and Jesús Esteban<sup>g</sup> <sup>a\*</sup>

<sup>a</sup> Department of Chemical Engineering, The University of Manchester, Oxford Road, Manchester M13 9PL, United Kingdom

<sup>b</sup> Department of Chemistry, The University of Manchester, Oxford Road, Manchester M13 9PL, United Kingdom

<sup>c</sup> Catalysis Hub, Research Complex at Harwell, Rutherford Appleton Laboratory, Oxfordshire OX11 0FA, United Kingdom

<sup>d</sup> Diamond Light Source Ltd, Harwell Science and Innovation Campus, Didcot, Oxfordshire OX11 0DE, United Kingdom

<sup>e</sup> University of Manchester at Harwell, Diamond Light Source, Didcot, Oxfordshire OX11 0DE, United Kingdom

<sup>f</sup> Nottingham Ningbo China Beacons of Excellence Research and Innovation Institute, Ningbo, 315100, China

<sup>g</sup> Department of Chemical Engineering and Materials, Faculty of Chemical Sciences, Complutense University of Madrid, Madrid 28040, Spain

\*Corresponding author: E-mail address: [jesus.estebanserrano@manchester.ac.uk](mailto:jesus.estebanserrano@manchester.ac.uk); [jeesteba@ucm.es](mailto:jeesteba@ucm.es) (Jesús Esteban)

### Table of Contents

|                                                                 |   |
|-----------------------------------------------------------------|---|
| S1: Sulphated Zirconia preparation .....                        | 2 |
| S2: Catalyst Characterisation .....                             | 2 |
| S3: HPLC Chromatogram of xylose and intermediate .....          | 3 |
| S4: TGA of catalysts post-recycling .....                       | 3 |
| S5: Catalyst recycling .....                                    | 4 |
| S6: Mass transfer limitations .....                             | 4 |
| S7: Partition ratio of Fur in a water-MIBK biphasic system..... | 5 |
| S8: Statistical metrics for modelling:.....                     | 5 |
| S9: Volume changes with respect to temperature .....            | 6 |
| S10: Model discrimination .....                                 | 6 |
| References.....                                                 | 7 |

# S1: Sulfated Zirconia preparation

Table S1: Sulfated Zirconia preparation details supplied by LuxferMEL.

| Sample                               | Dopant          | Calcination Temperature (°C) | Calcination Time (h) | Dopant Loading (%) |
|--------------------------------------|-----------------|------------------------------|----------------------|--------------------|
| SO <sub>4</sub> /ZrO <sub>2</sub> -1 | SO <sub>3</sub> | 650                          | 2                    | 6.0                |
| SO <sub>4</sub> /ZrO <sub>2</sub> -2 | SO <sub>3</sub> | 650                          | 2                    | 8.1                |
| SO <sub>4</sub> /ZrO <sub>2</sub> -3 | SO <sub>3</sub> | 610                          | 2                    | 6.0                |

## S2: Statistical metrics for modelling:

$$RMSE = \sqrt{\frac{\sum_{i=1}^n (x_i - \hat{x}_i)^2}{N - P}} \quad S1$$

$$AIC = N \cdot \ln \left( \frac{\sum_{i=1}^n (x_i - \hat{x}_i)^2}{N} \right) + 2P \quad S2$$

$$BIC = N \cdot \ln \left( \frac{\sum_{i=1}^n (x_i - \hat{x}_i)^2}{N} \right) + P \ln N \quad S3$$

$$F = \frac{\sum_{i=1}^n \frac{(\hat{x}_i)^2}{P}}{\sum_{i=1}^n \frac{(x_i - \hat{x}_i)^2}{N - P}} \quad S4$$

Where  $x_i$  is experimental value,  $\hat{x}_i$  the predicted value, N is the number of observations, and P is the number of parameters.

### S3: Catalyst Characterisation

Table S2: Sulfated zirconia physical properties., where <sup>a</sup> C<sub>B</sub> and C<sub>L</sub> represents the concentration of Brønsted and Lewis acid sites, respectively. <sup>b</sup> Based on the first peak integration in the corresponding NH<sub>3</sub>-TPD spectra. <sup>c</sup> Based on the second peak integration in the corresponding NH<sub>3</sub>-TPD spectra. <sup>d</sup> Determined by py-IR

| Sample                               | C <sub>B</sub> /C <sub>L</sub> <sup>a</sup> | Medium acidity <sup>b</sup><br>(μmol g <sup>-1</sup> ) |                    | Strong acidity <sup>c</sup><br>(μmol g <sup>-1</sup> ) |                    | Total B- or L- acidity<br>(μmol g <sup>-1</sup> ) |       | Total NH <sub>3</sub> -TPD acidity<br>(μmol g <sup>-1</sup> ) | Surface area<br>(m <sup>2</sup> g <sup>-1</sup> ) | Average Pore diameter<br>(nm) | Pore Volume<br>(cm <sup>3</sup> g <sup>-1</sup> ) |
|--------------------------------------|---------------------------------------------|--------------------------------------------------------|--------------------|--------------------------------------------------------|--------------------|---------------------------------------------------|-------|---------------------------------------------------------------|---------------------------------------------------|-------------------------------|---------------------------------------------------|
|                                      |                                             | Brønsted <sup>d</sup>                                  | Lewis <sup>d</sup> | Brønsted <sup>d</sup>                                  | Lewis <sup>d</sup> | Brønsted                                          | Lewis |                                                               |                                                   |                               |                                                   |
|                                      |                                             |                                                        |                    |                                                        |                    |                                                   |       |                                                               |                                                   |                               |                                                   |
| SO <sub>4</sub> /ZrO <sub>2</sub> -1 | 14.78                                       | 535.7                                                  | 36.2               | 26.0                                                   | 1.8                | 561.7                                             | 38.0  | 599.7                                                         | 98                                                | 5.9                           | 0.14                                              |
| SO <sub>4</sub> /ZrO <sub>2</sub> -2 | 6.93                                        | 595.2                                                  | 85.8               | 27.5                                                   | 4.0                | 622.7                                             | 89.8  | 712.5                                                         | 113                                               | 10.1                          | 0.29                                              |
| SO <sub>4</sub> /ZrO <sub>2</sub> -3 | 4.44                                        | 723.9                                                  | 163.1              | 3.7                                                    | 0.8                | 727.6                                             | 163.9 | 891.5                                                         | 153                                               | 12.4                          | 0.47                                              |

### S4: HPLC Chromatogram of xylose and intermediate

a) Aqueous - RID

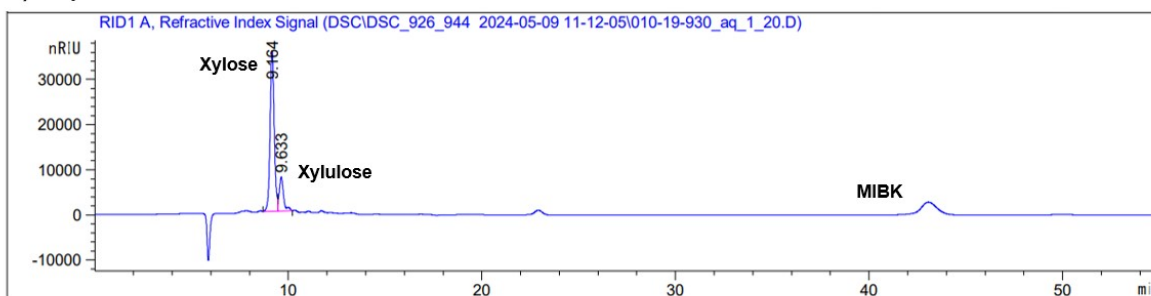

b) Organic - DAD 282 nm

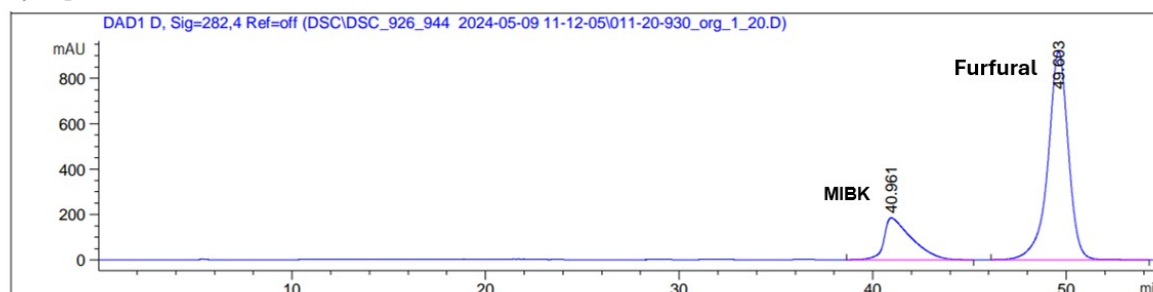

Figure S1:a) HPLC RID Chromatogram of aqueous phase and b) organic phase post-reaction at 160 °C after 10 min, 10 wt.% xylose loading and 2 wt.% SO<sub>4</sub>/ZrO<sub>2</sub>-1 loading.

## S5: TGA of catalysts post-recycling

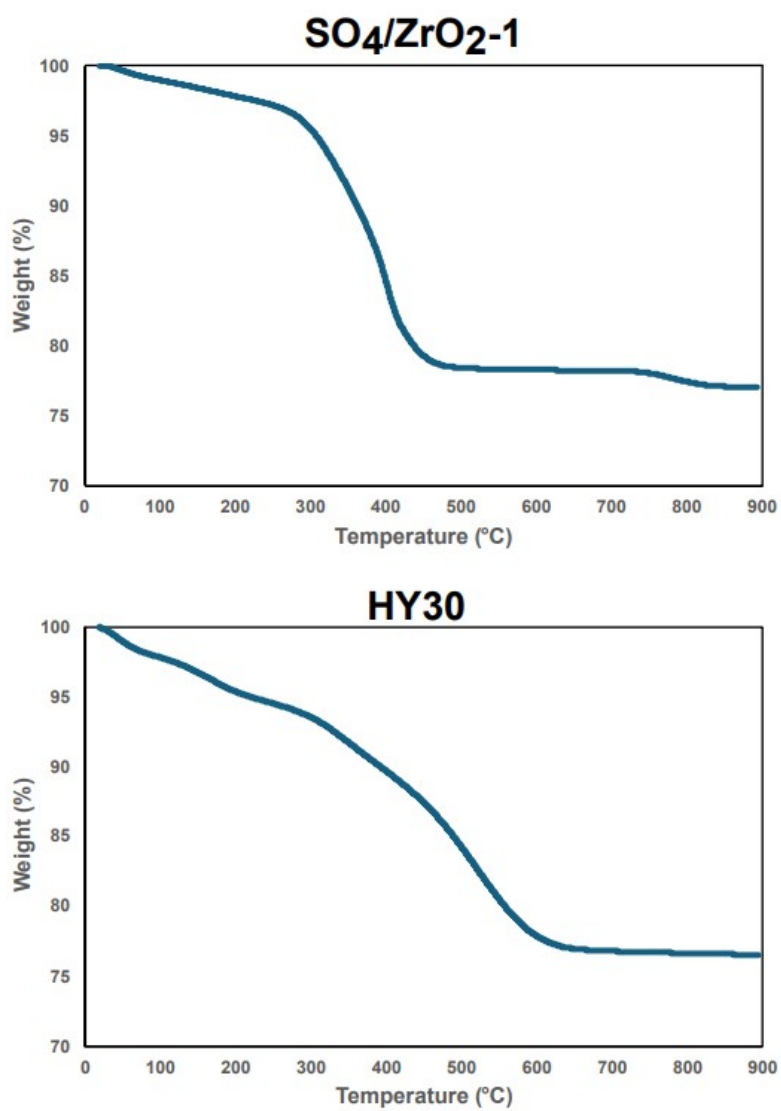

Figure S2: TGA analysis of SO<sub>4</sub>/ZrO<sub>2</sub>-1 and HY30 after 5 recycle runs

## S6: Catalyst recycling

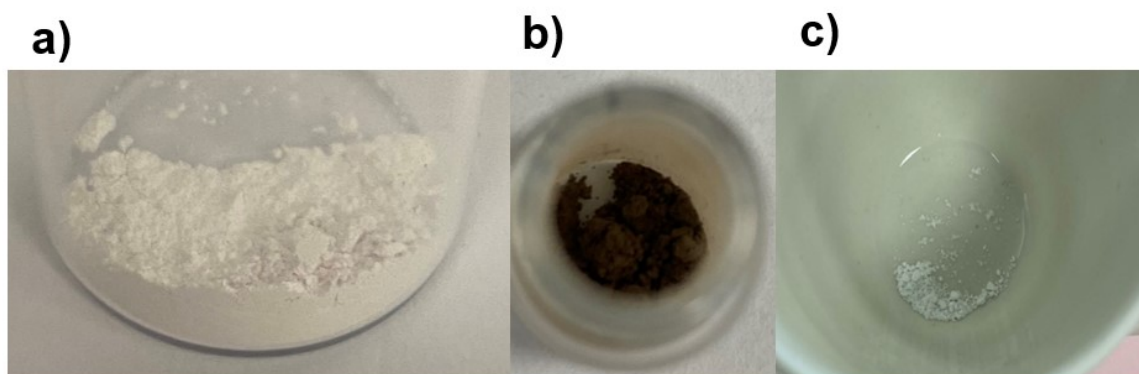

Figure S3: a) Fresh  $\text{SO}_4/\text{ZrO}_2-1$ , b)  $\text{SO}_4/\text{ZrO}_2-1$  after six total reaction and recycle runs, c)  $\text{SO}_4/\text{ZrO}_2-1$  regenerated through calcination in air at  $550\text{ }^\circ\text{C}$

## S7: Mass transfer limitations

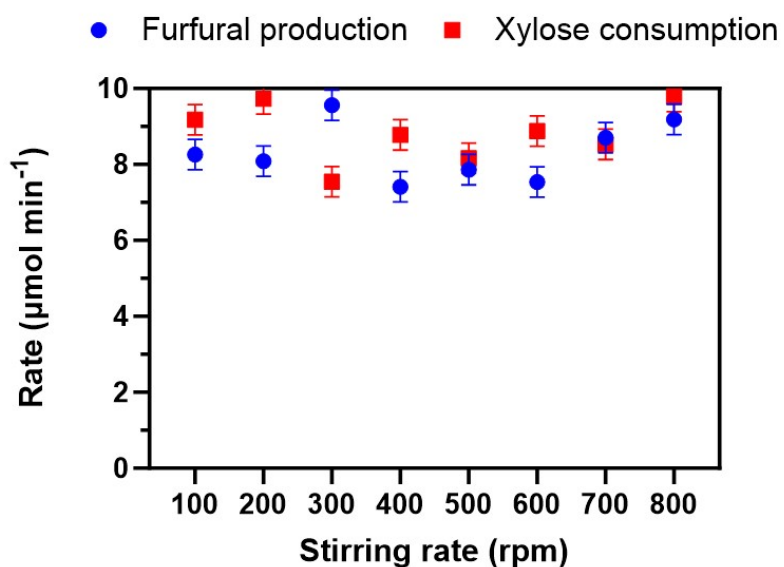

Figure S4: External mass transfer limitations in  $\text{SO}_4/\text{ZrO}_2-1$  through variation of agitation rate on xylose conversion a) and b) total Fur yield (circle markers) with PR (square markers) at  $160\text{ }^\circ\text{C}$ .

## S8: Volume changes with respect to temperature

Table S3: Fitting parameters for water-MIBK phase ratio changes obtained from Guo et al. <sup>1</sup>

| Phase | Initial (Org:Aq) | $u^1$ | $v^1$ | $w^1$ |
|-------|------------------|-------|-------|-------|
| (-)   | (-)              | (-)   | (-)   | (-)   |
| Aq    | 2                | 0.898 | 0.092 | 0.003 |
| Org   | 2                | 0.781 | 0.193 | 0.006 |

The actual phase ratios were calculated using eq. 5 and the parameters in Table S2, with results for 140-170 °C presented in Table S3.

Table S4: Temperature specific phase ratios for 1:2 water-MIBK system.

| T (°C) | $\gamma_{aq}$ | $\gamma_{org}$ | (Org:Aq) |
|--------|---------------|----------------|----------|
| 140    | 1.038         | 1.228          | 2.366    |
| 150    | 1.042         | 1.256          | 2.410    |
| 160    | 1.047         | 1.285          | 2.455    |
| 170    | 1.051         | 1.316          | 2.504    |

## S9: Partition ratio of Fur in a water-MIBK biphasic system

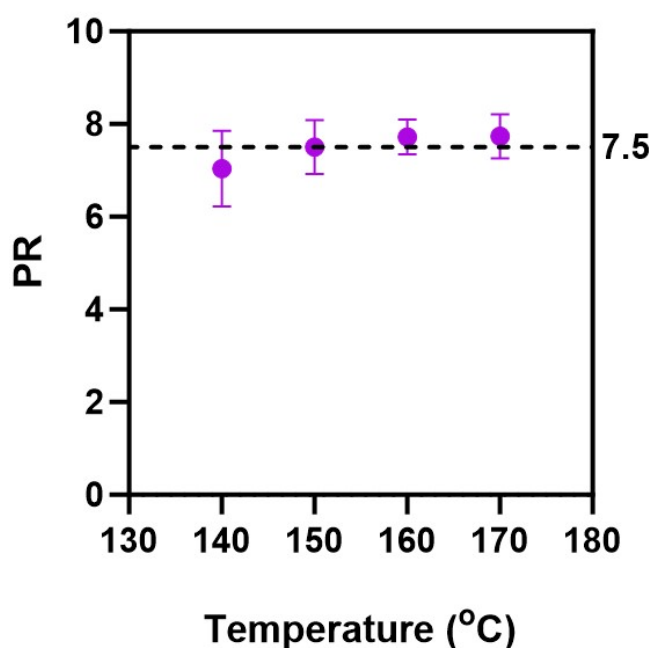

Figure S5: Partition ratio of Fur in a 1:2 water-MIBK system at 10 wt. xylose loading and 2 wt.%  $SO_4/ZrO_2$ -1 loading, averaged values from 0-180 mins at temperatures 140-170 °C.

## S10: Model discrimination

Table S5: True values for the statistical model discrimination.

| Model  | Including Humins |          |          |          | Excluding Humins |          |          |          |
|--------|------------------|----------|----------|----------|------------------|----------|----------|----------|
|        | RMSE             | AIC      | BIC      | F-stat   | RMSE             | AIC      | BIC      | F-stat   |
| PH-1   | 0.0880           | -1845.45 | -1771.56 | 70.11149 | 0.0337           | -2567.07 | -2497.07 | 469.0008 |
| PH-2   | 0.0880           | -1934.79 | -1860.91 | 86.00239 | 0.0627           | -2427.44 | -2357.44 | 424.4671 |
| PH-2a  | 0.0880           | -1839.04 | -1765.15 | 67.8553  | 0.0331           | -2564.92 | -2494.92 | 463.0457 |
| PH-2b  | 0.0880           | -1935.07 | -1861.18 | 86.20412 | 0.0630           | -2423.68 | -2353.68 | 419.4291 |
| PH-2c  | 0.0880           | -1854.75 | -1780.86 | 73.89529 | 0.0340           | -2573.9  | -2503.9  | 481.3725 |
| PH-2d  | 0.0880           | -1932.31 | -1858.42 | 85.09418 | 0.0623           | -2427.12 | -2357.12 | 420.8326 |
| PH-2e  | 0.0880           | -1839.82 | -1765.93 | 68.14509 | 0.0332           | -2563.07 | -2493.07 | 460.6618 |
| PH-2f  | 0.0880           | -1934.18 | -1860.29 | 85.76331 | 0.0628           | -2426.32 | -2356.32 | 422.5267 |
| ER-1   | 0.1210           | -1913.32 | -1816.1  | 79.07691 | 0.0550           | -2628.27 | -2534.94 | 444.7985 |
| LHHW-1 | 0.1232           | -1916.35 | -1819.12 | 82.4266  | 0.0455           | -2664.15 | -2570.82 | 478.6492 |
| ER-2   | 0.1217           | -1916.51 | -1827.07 | 82.4917  | 0.0588           | -2586.46 | -2500.91 | 437.2772 |
| LHHW-2 | 0.1217           | -1916.51 | -1827.07 | 82.4917  | 0.0588           | -2586.46 | -2500.91 | 437.2772 |
| ER-3   | 0.1217           | -1916.52 | -1827.08 | 82.49361 | 0.0588           | -2586.45 | -2500.9  | 437.2691 |
| LHHW-3 | 0.1217           | -1916.51 | -1827.07 | 82.49107 | 0.0588           | -2586.47 | -2500.92 | 437.2924 |
| ER-4   | 0.1209           | -1907.72 | -1810.5  | 77.28441 | 0.0534           | -2628.26 | -2534.92 | 437.2251 |
| LHHW-4 | 0.1215           | -1914.73 | -1817.51 | 78.99855 | 0.0549           | -2610.27 | -2516.94 | 412.0037 |
| ER-5   | 0.1209           | -1934.51 | -1837.29 | 98.0439  | 0.0534           | -2628.84 | -2535.5  | 438.0154 |
| LHHW-5 | 0.1227           | -1915.09 | -1817.87 | 82.51953 | 0.0544           | -2661.9  | -2568.56 | 473.0897 |

## References

- (1) Guo, W.; Zhang, Z.; Hacking, J.; Heeres, H. J.; Yue, J., Selective fructose dehydration to 5-hydroxymethylfurfural from a fructose-glucose mixture over a sulfuric acid catalyst in a biphasic system: Experimental study and kinetic modelling. *Chem. Eng. J.* **2021**, *409*, 128182.
